# Supplementary material for: Inhibition of glycogen synthase kinase-3 beta induces apoptosis and mitotic catastrophe by disrupting centrosome regulation in cancer cells
Source: PubMed Central journal article supplement (PMC4543981; doi:10.1038/srep13249), 2015-08-21
Supplement: srep13249-s1.pdf [file srep13249-s1.pdf]

***Title: Inhibition of glycogen synthase kinase-3 beta induces apoptosis and mitotic catastrophe by disrupting centrosome regulation in cancer cells***

Authors: Yuki Yoshino<sup>1</sup>, Chikashi Ishioka<sup>1, 2, \*</sup>

<sup>1</sup> Department of Clinical Oncology, Institute of Development, Aging and Cancer, Tohoku University, Seiryomachi 4-1, Aoba-ku, Sendai 980-8575, Japan

<sup>2</sup> Department of Medical Oncology, Tohoku University Hospital, Tohoku University, Seiryomachi 1-1, Aoba-ku, Sendai 980-8574, Japan

\* Correspondence author

Department of Clinical Oncology, Institute of Development, Aging and Cancer, Tohoku University, Seiryomachi 4-1, Aoba-ku, Sendai, 980-8575, Japan

Tel: +81 227178547; Fax: +81 227178548

Email: [chikashi@idac.tohoku.ac.jp](mailto:chikashi@idac.tohoku.ac.jp)

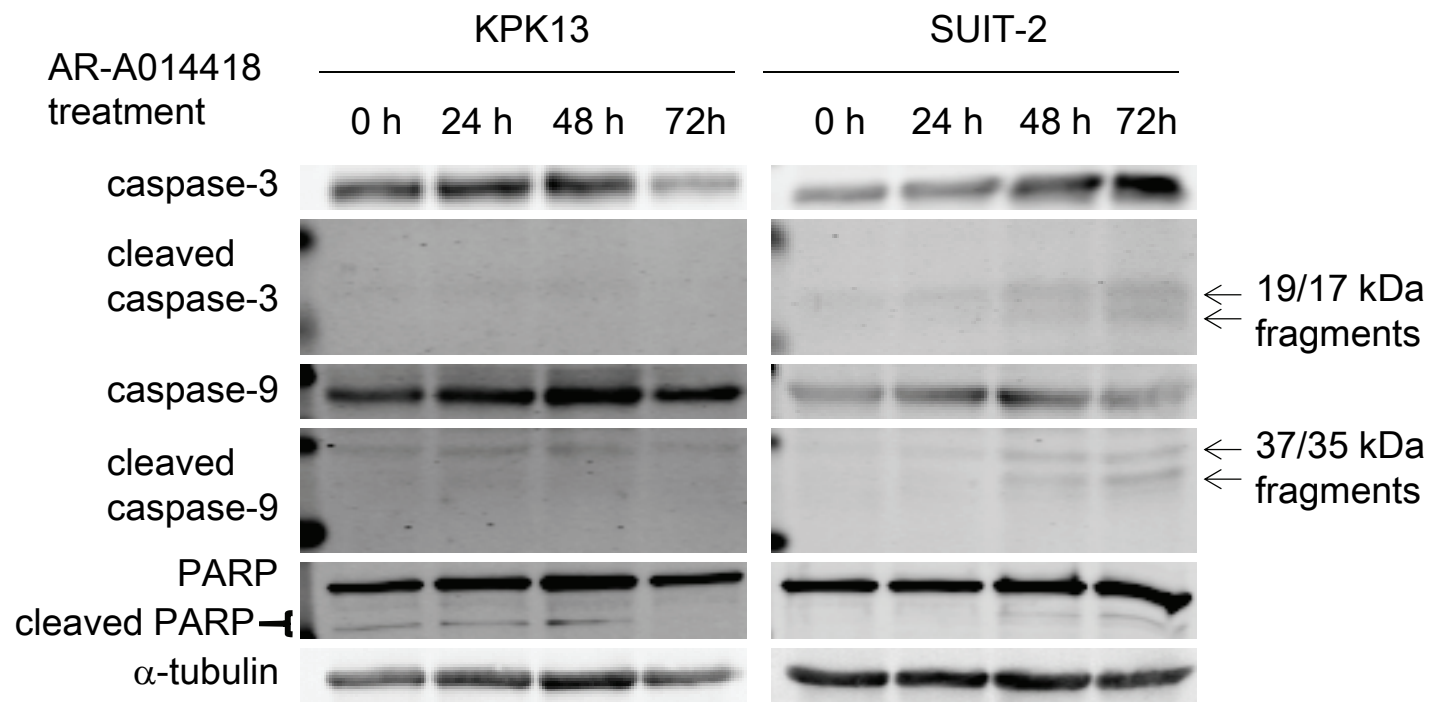

**Supplementary Figure S1.** Expression of apoptosis related proteins after AR-A0114418 treatment in resistant cell lines. Cells were harvested at the indicated times after adding 20  $\mu$ M AR-A014418 and subjected to western blot.

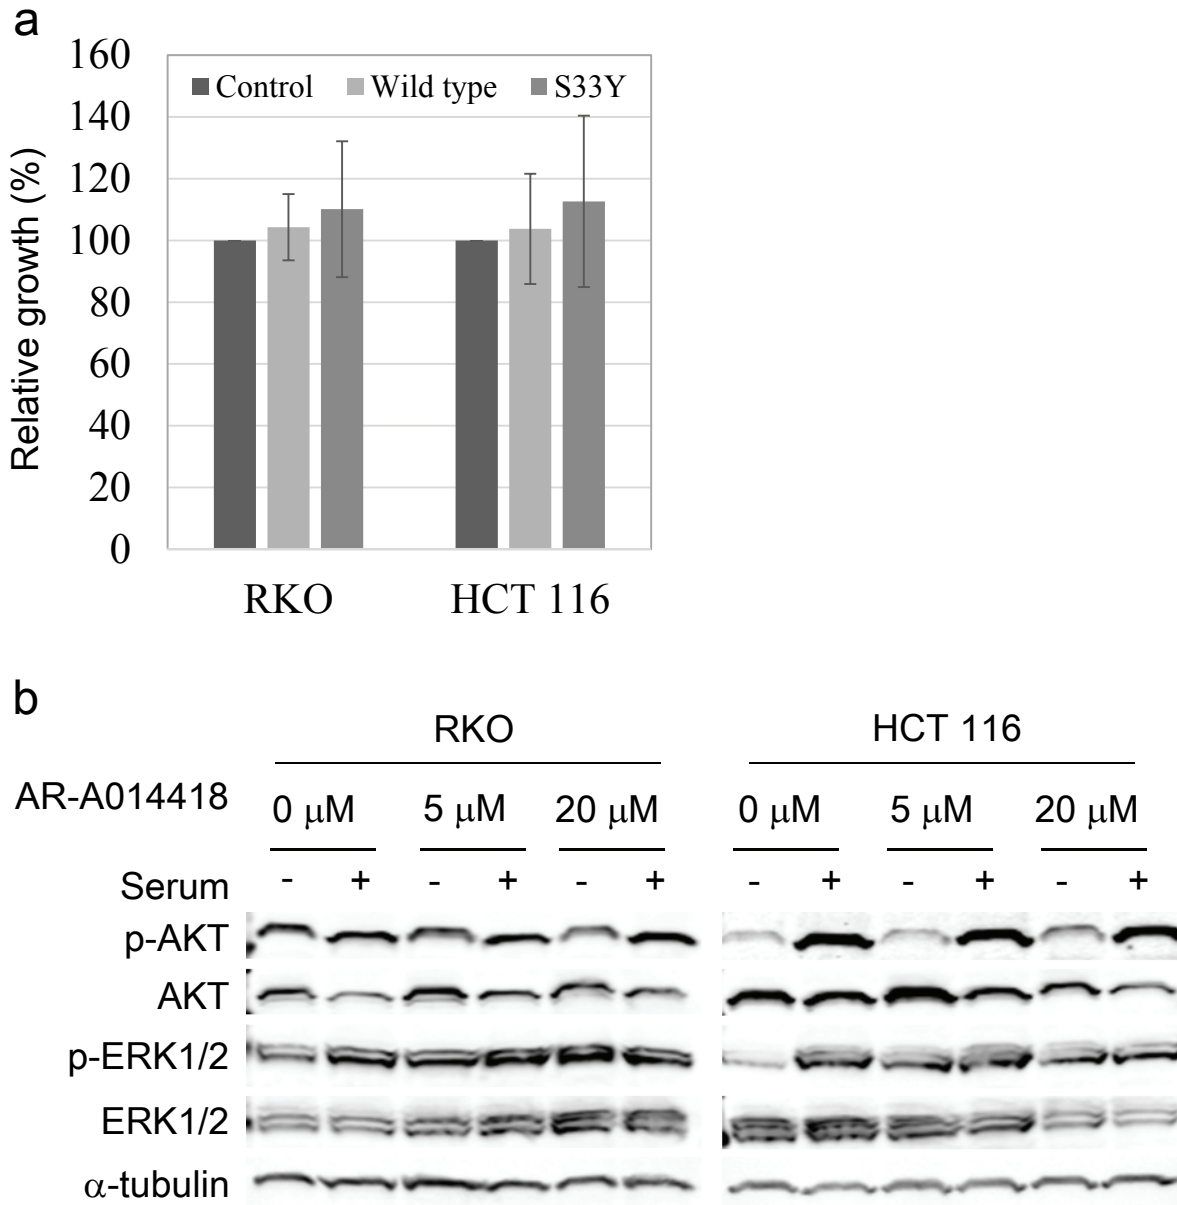

**Supplementary Figure S2.** Effects of AR-A0114418 on Wnt/ $\beta$ -catenin, PI3K/AKT, and MAPK pathways.

(a) Empty, wild-type  $\beta$ -catenin, or S33Y mutant  $\beta$ -catenin expression vectors were transfected to HeLa cells. Cell cycle was analyzed 96 h after transfection. (b) Cells were treated with AR-A0114418 at indicated concentrations for 48 h.

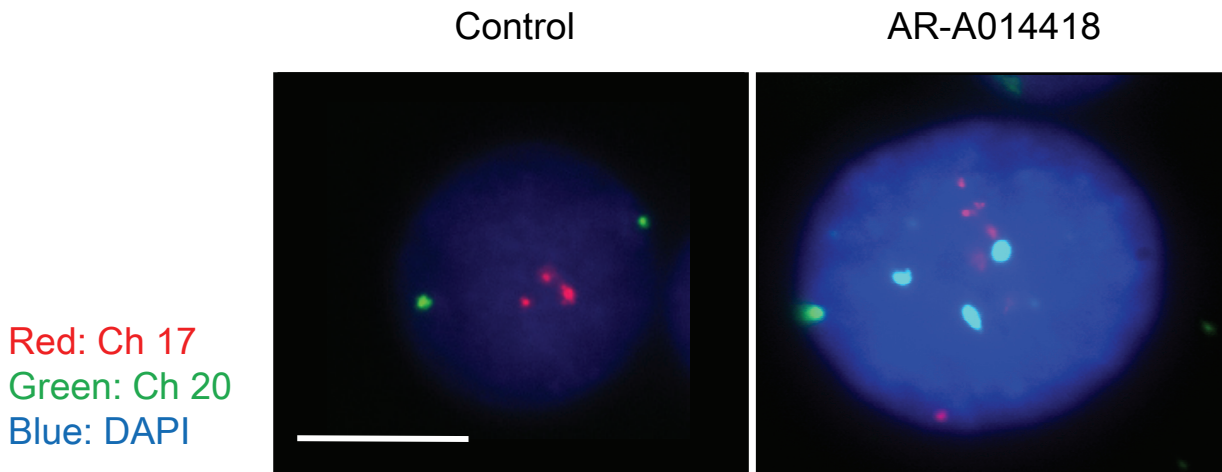

**Supplementary Figure S3.** FISH analysis after AR-A0114418 treatment.

RKO was treated with DMSO or 20  $\mu$ M AR-A0114418 for 48 h and stained with probes specific to chromosome 17 and 20. Representative images are shown. Pattern of change in chromosomal number was varied from cell to cell. Because long-term (120 h) treatment disrupted cell morphology, evaluation was difficult. (Scale bar = 10  $\mu$ m)

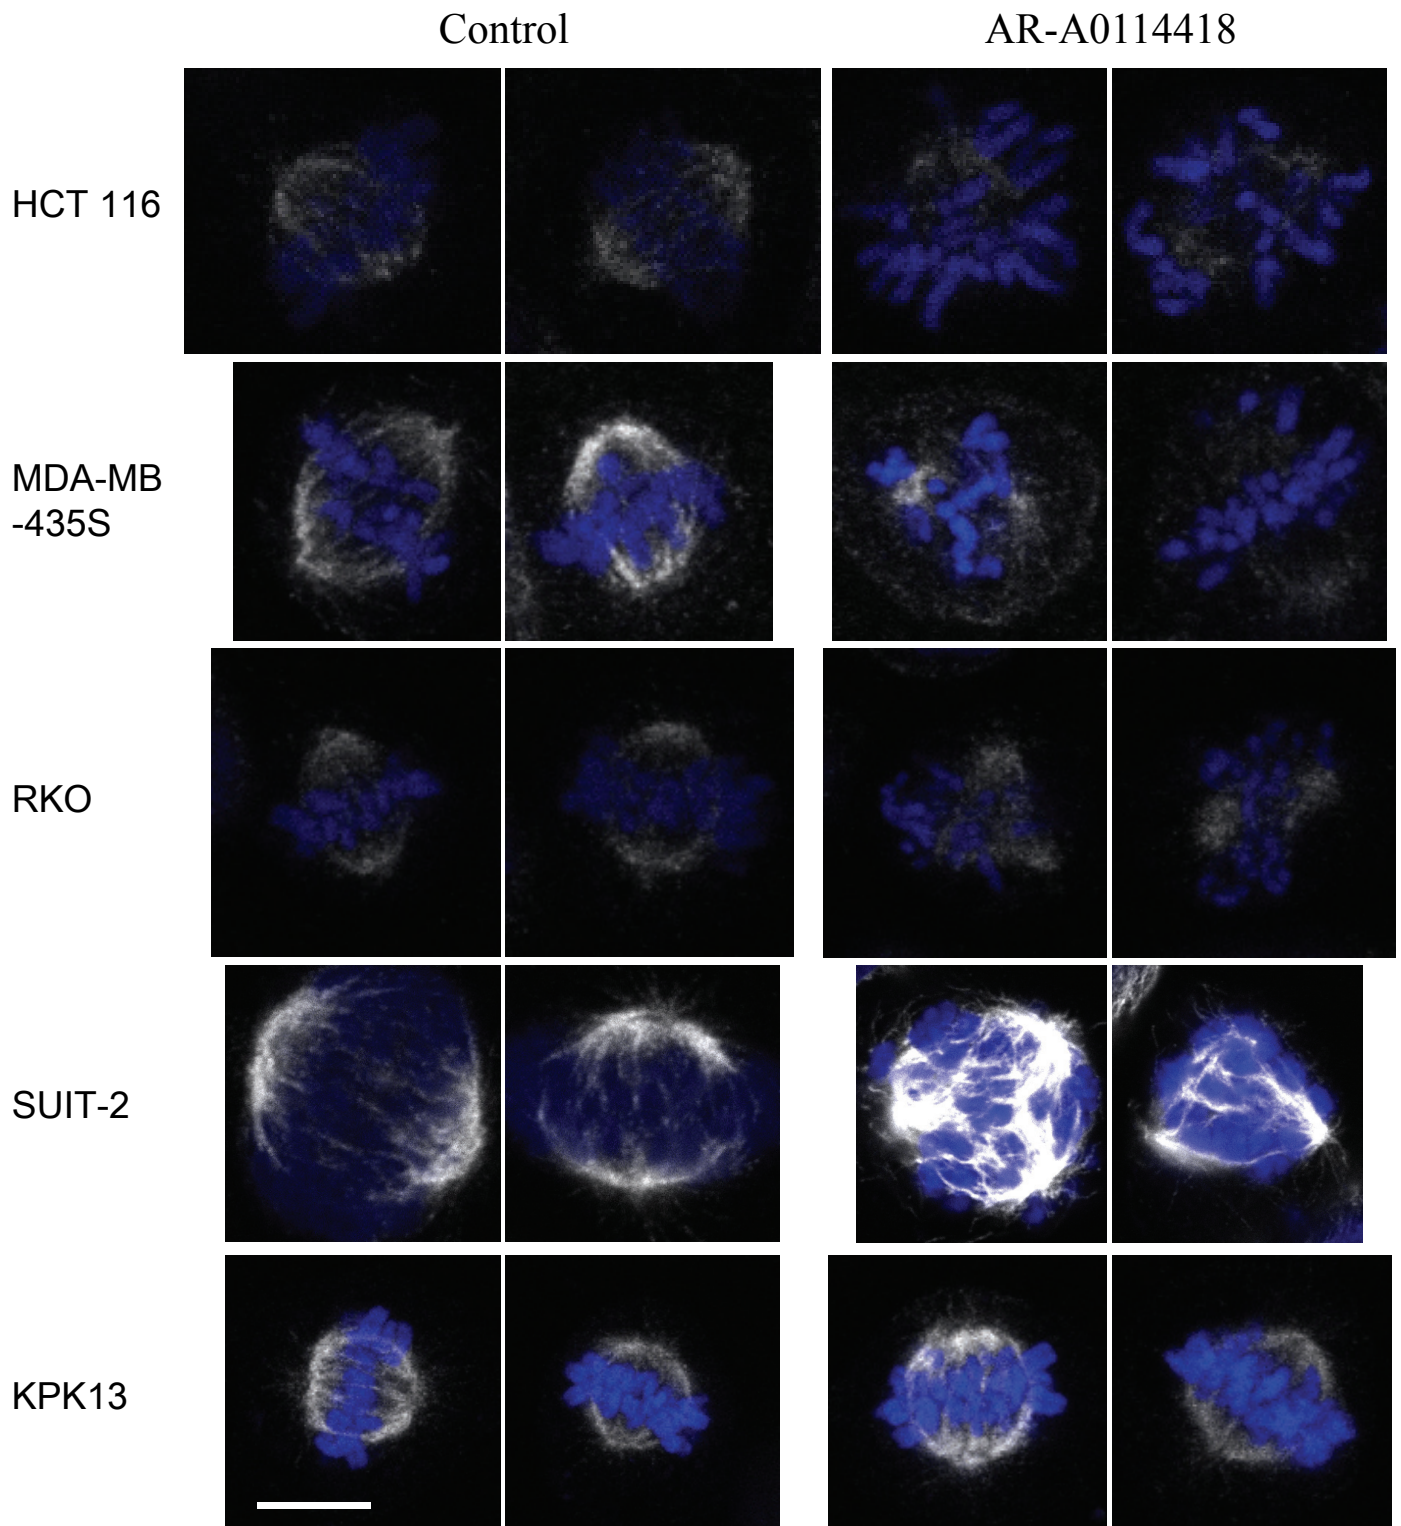

**Supplementary Figure S4.** Morphology of mitosis after AR-A0114418 treatment.

Each cell was treated with DMSO or 20  $\mu$ M AR-A0114418 for 48 h. Representative images are shown. (Scale bar = 10  $\mu$ m)

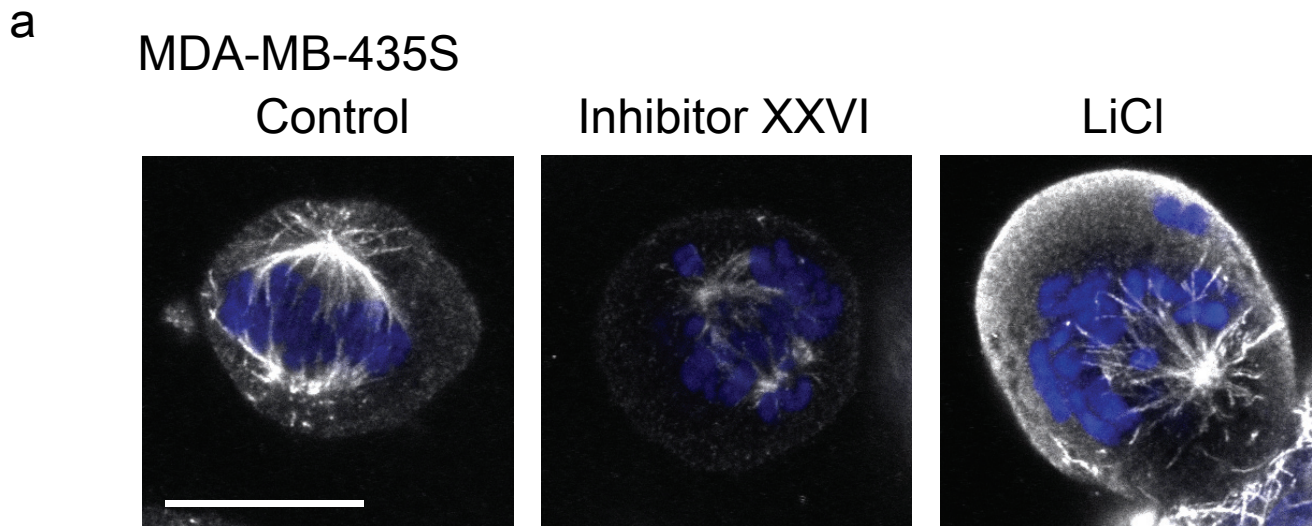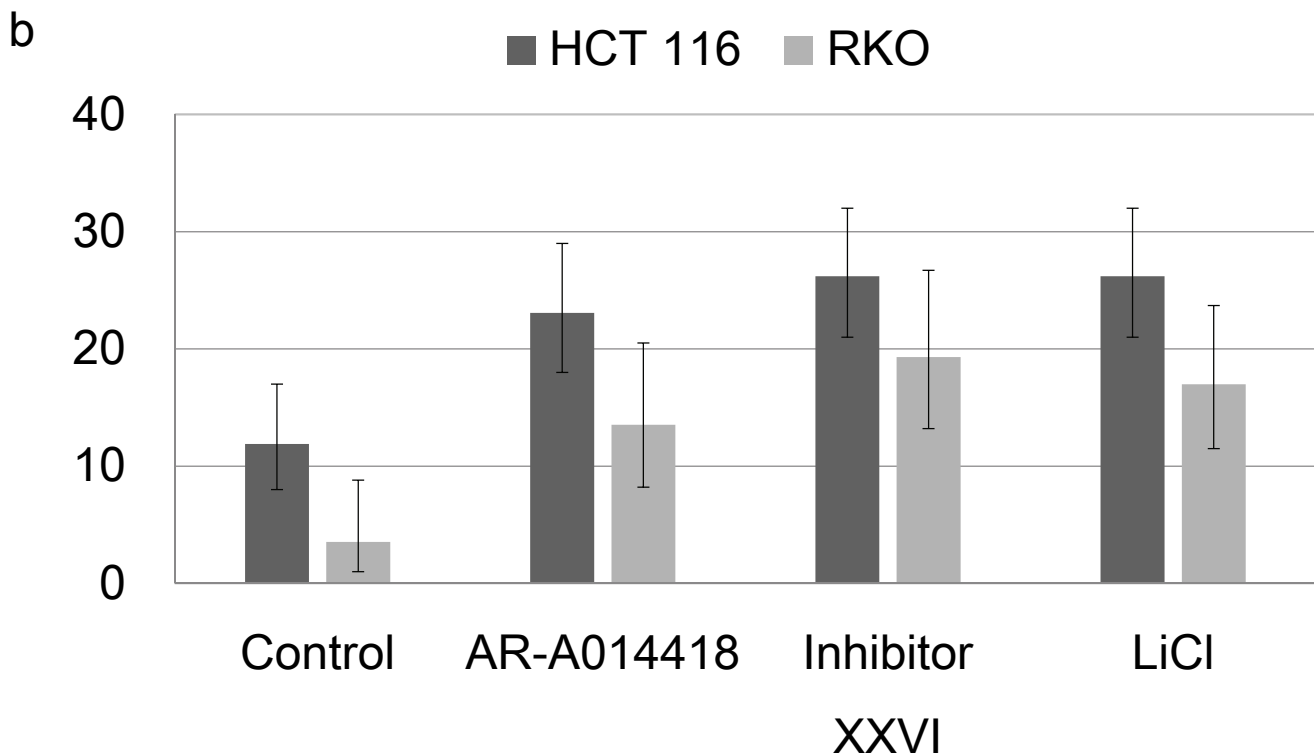

**Supplementary Figure S5.** Effects of GSK-3 $\beta$  inhibitors distinct from AR-A0114418.

(a) Mitotic spindles after treatment with GSK-3 $\beta$  inhibitors. MDA-MB-435S cells were treated with GSK-3 $\beta$  inhibitor XXVI (Inhibitor XXVI) or lithium chloride (LiCl) for 48 h.

(b) Frequencies of centrosome abnormalities induced by treatment with GSK-3 $\beta$  inhibitors. HCT 116 and RKO Cells were treated with 20  $\mu$ M AR-A0114418, 10  $\mu$ M GSK-3 $\beta$  inhibitor XXVI, and 50 mM lithium chloride for 48 h. At least 100 cells were examined in each sample. CIs and p-values were calculated by Fisher's exact test. Error bars indicate 95% CIs (\* p < 0.01).

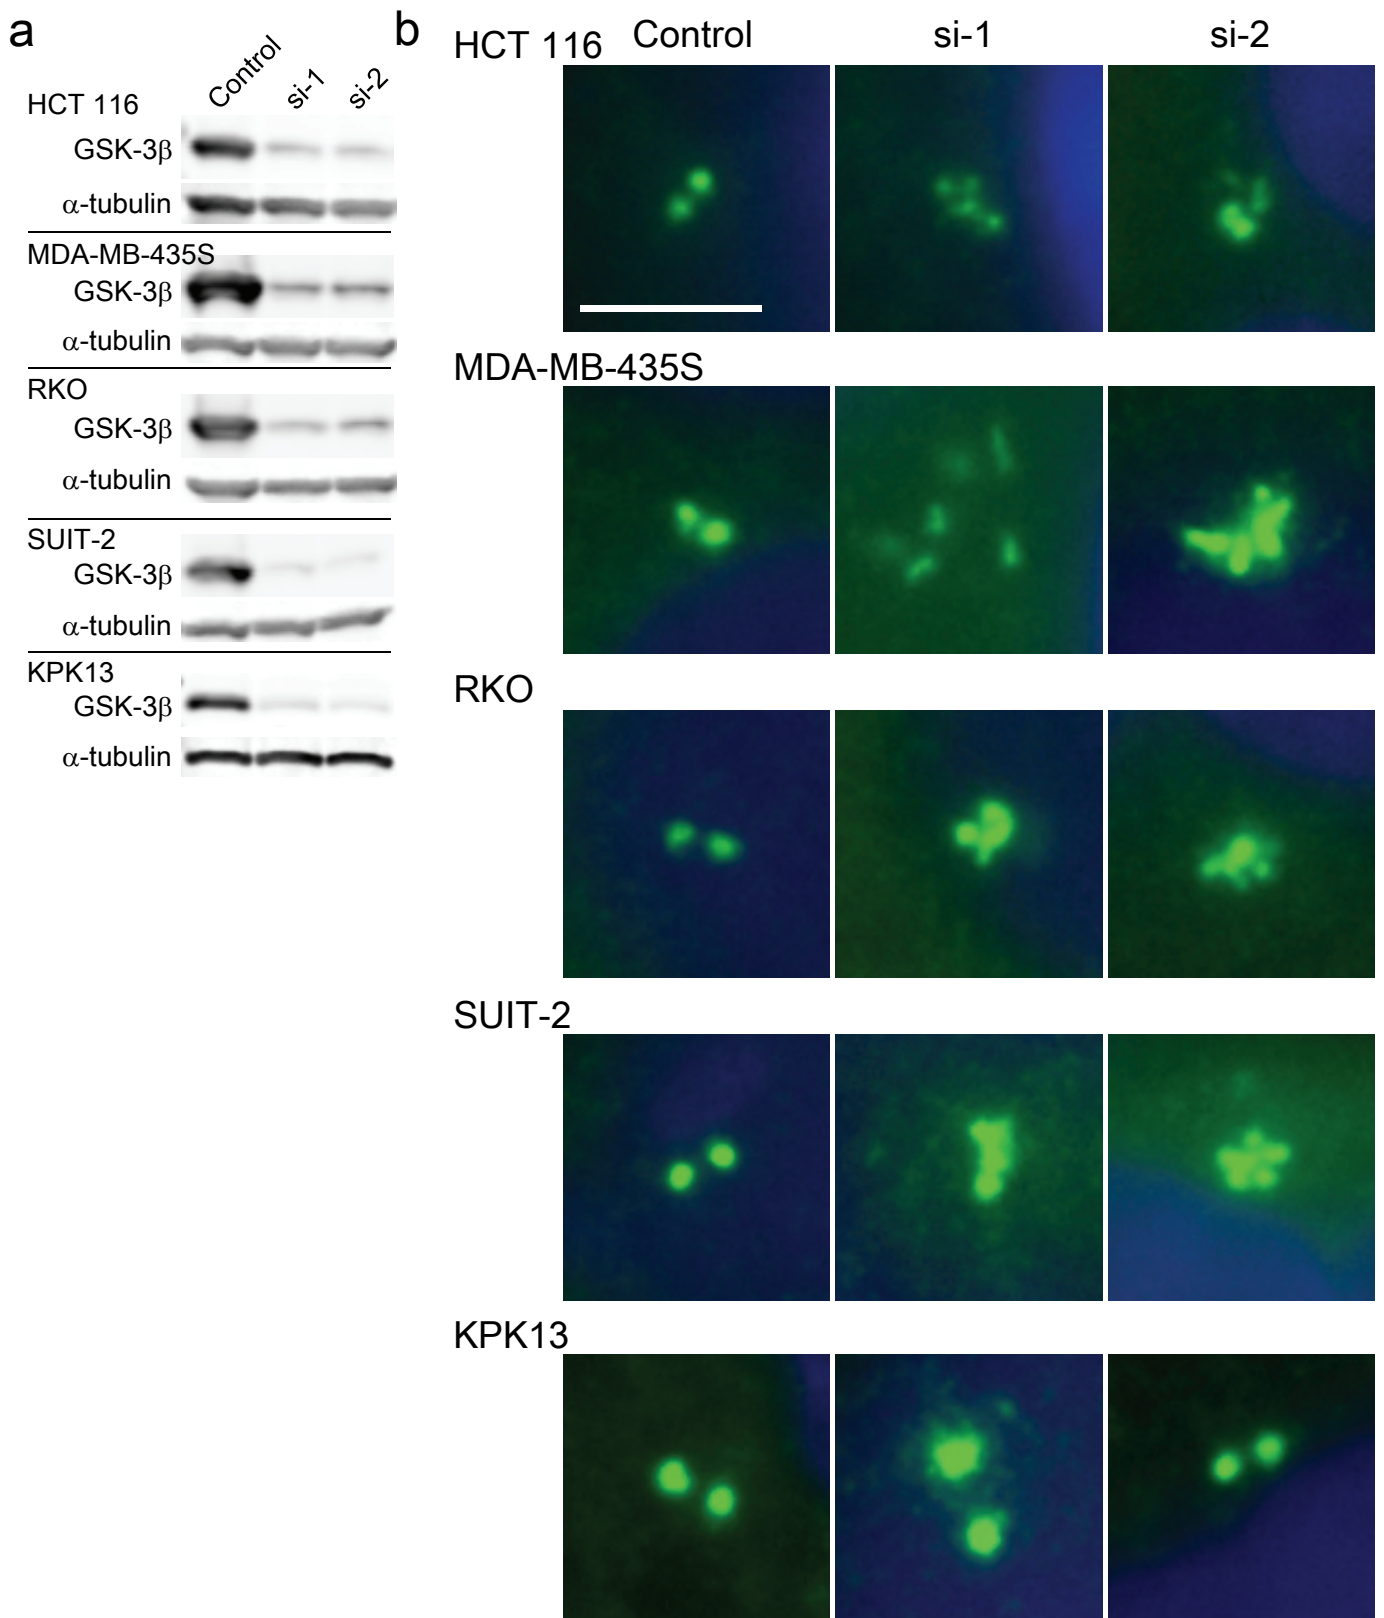

**Supplementary Figure S6.** Centrosome changes after GSK-3 $\beta$  knock-down.

(a) After 72 h from transfection with 10 nM control or GSK-3 $\beta$ -targeting siRNA, cells were lysed and subjected to western blotting.

(b) Cells were subjected to immunocytostaining 72 h after transfection with 10 nM control or GSK-3 $\beta$ -targeting siRNA. Representative images are shown. (Scale bar = 5  $\mu$ m)

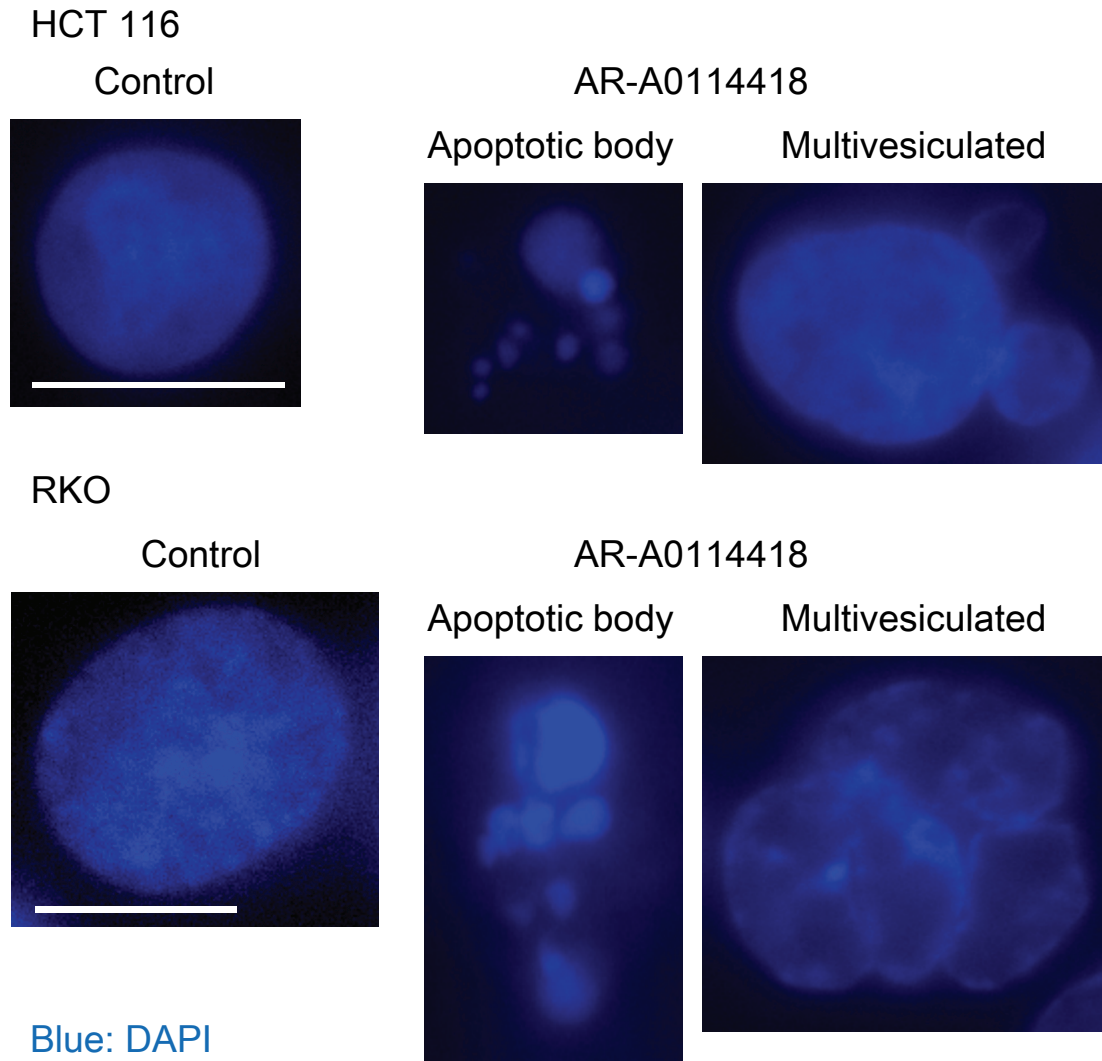

**Supplementary Figure S7.** Morphology of nuclei after AR-A0114418 treatment.

Each cell was treated with DMSO or 20  $\mu$ M AR-A0114418 for 48 h. Representative images are shown. (Scale bar = 10  $\mu$ m)



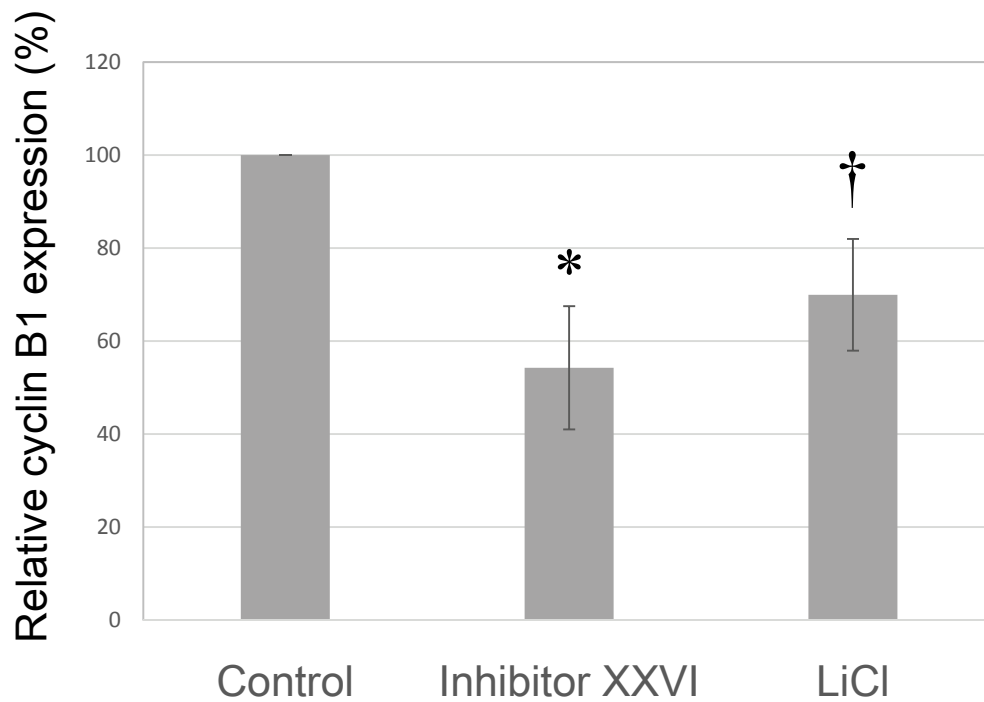

**Supplementary Figure S8.** Relative protein expression of cyclin B1 after GSK-3 $\beta$  inhibitors.

MDA-MB-435S cells were treated with 10  $\mu$ M GSK-3 $\beta$  inhibitor XXVI or 50 mM LiCl for 72 h. Error bars indicate 95% CI. (\*  $p = 0.003$ , †  $p = 0.024$ , compared with control, Dunnett's test)

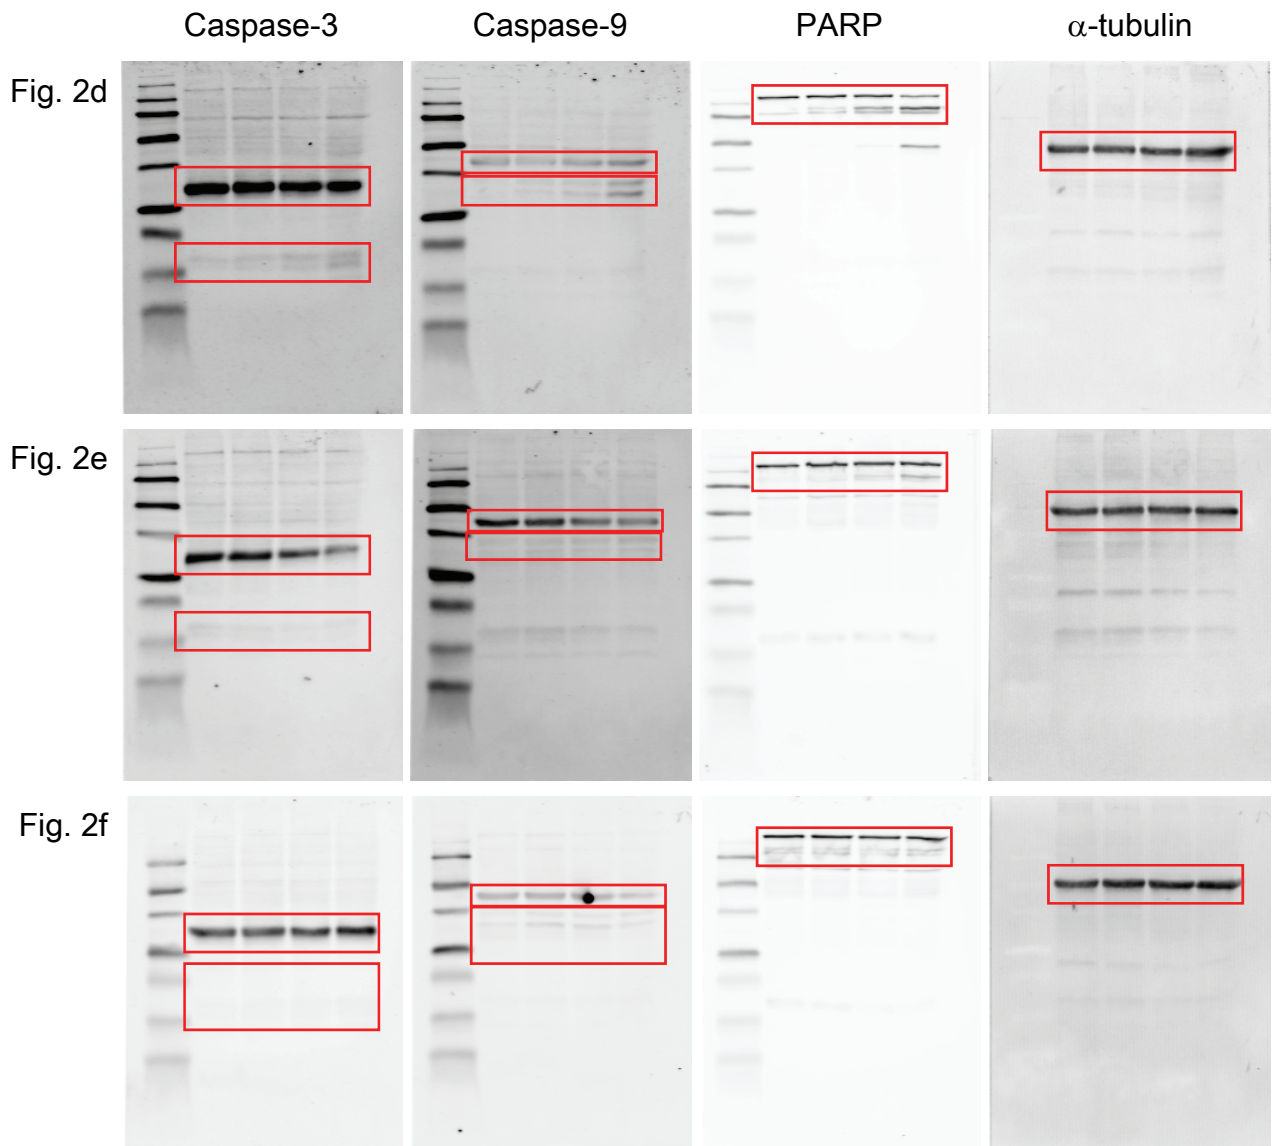

**Supplementary Figure S9.** Uncropped images of Western blotting of Fig. 2d, e, and f

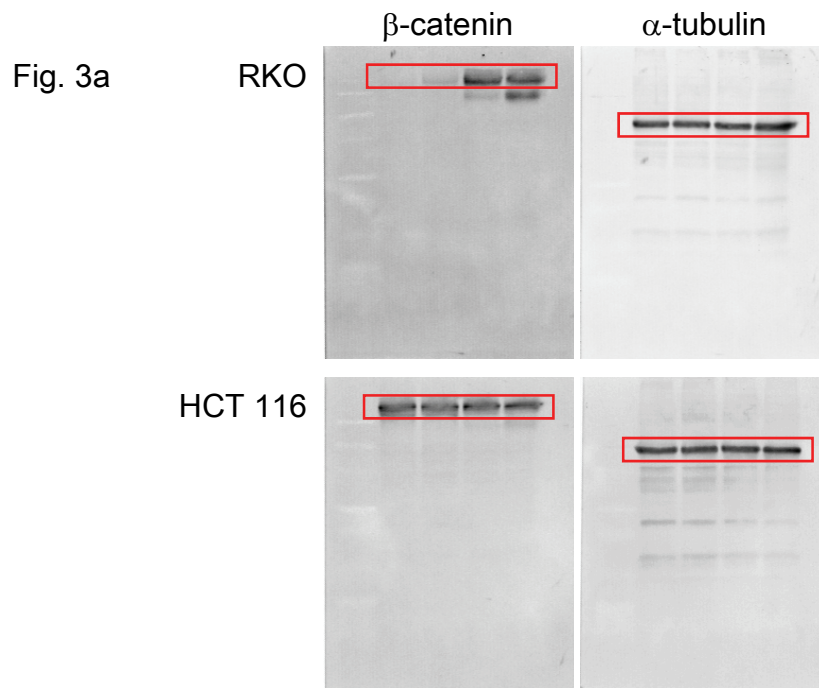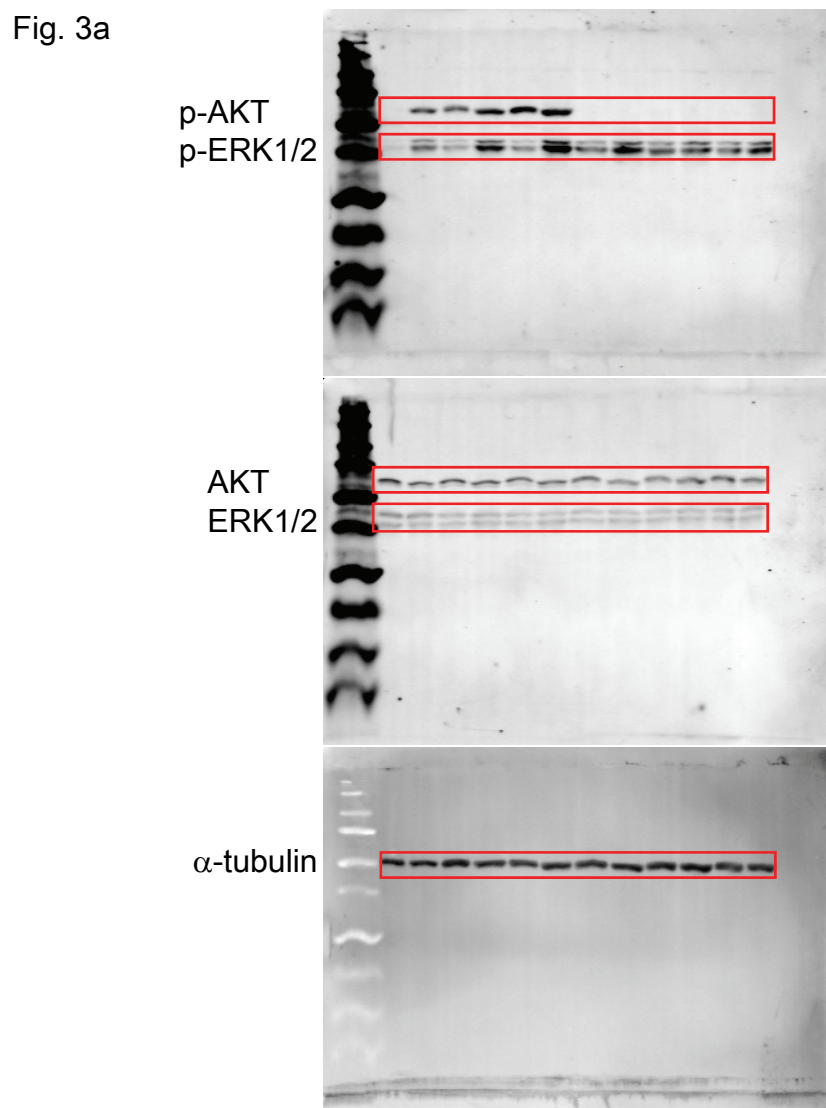

**Supplementary Figure S10.** Uncropped images of Western blotting of Fig. 3a and e

Fig. 6a

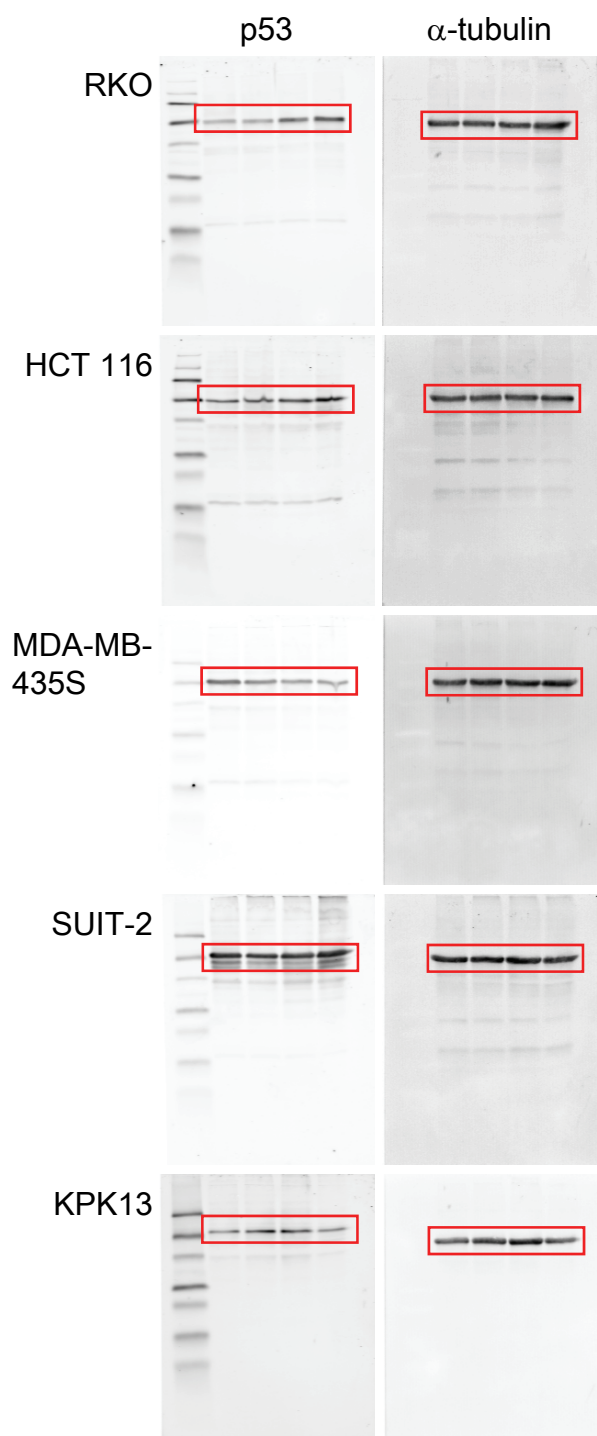

Fig. 6b

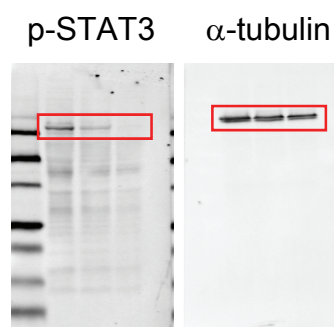

Fig. 6d

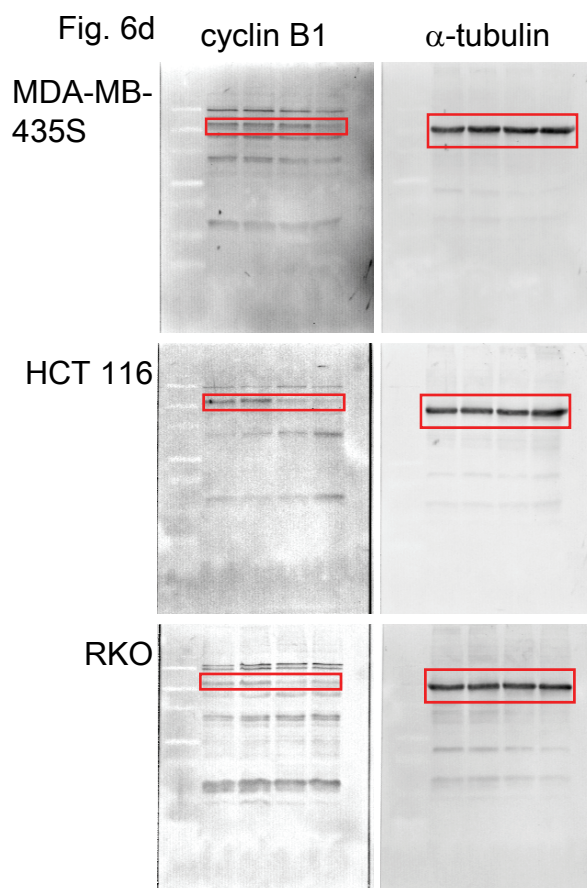

**Supplementary Figure S11.** Uncropped images of Western blotting of Fig. 6a, b, and d

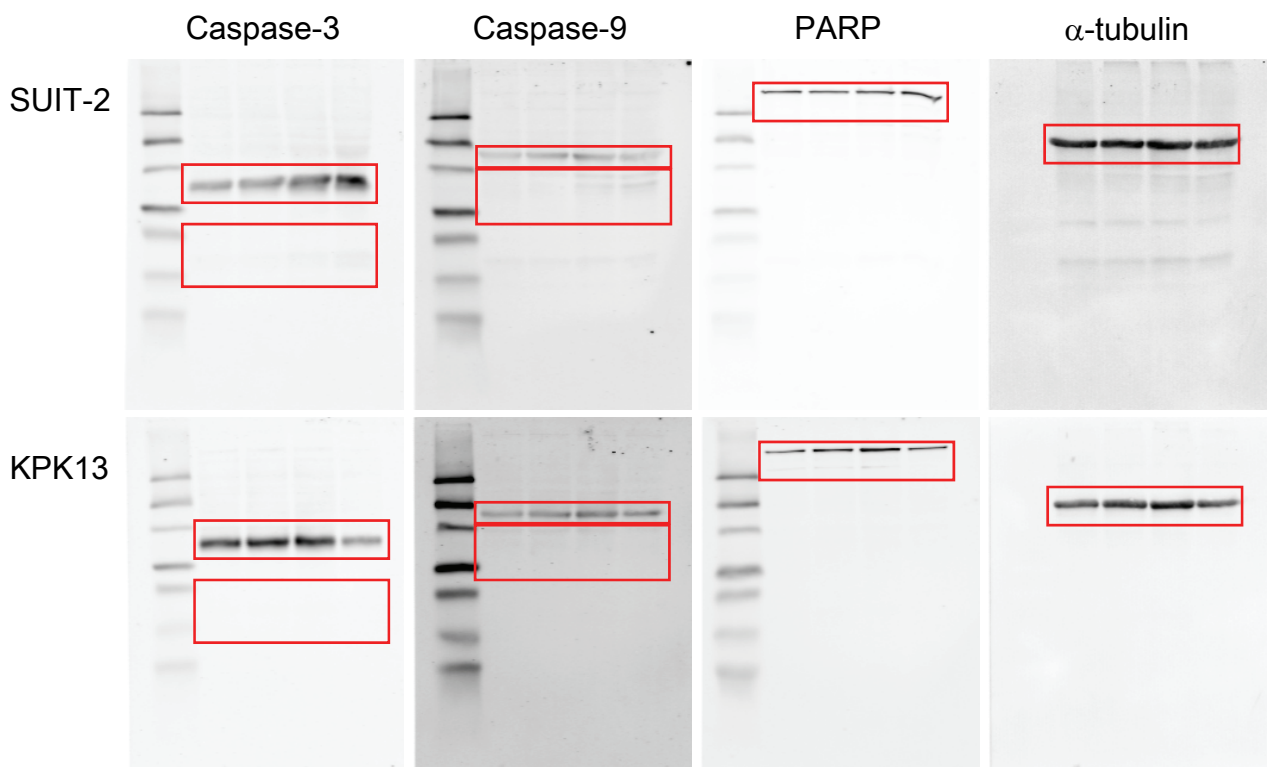

**Supplementary Figure S12.** Uncropped images of Western blotting if Supplementary Fig. S1

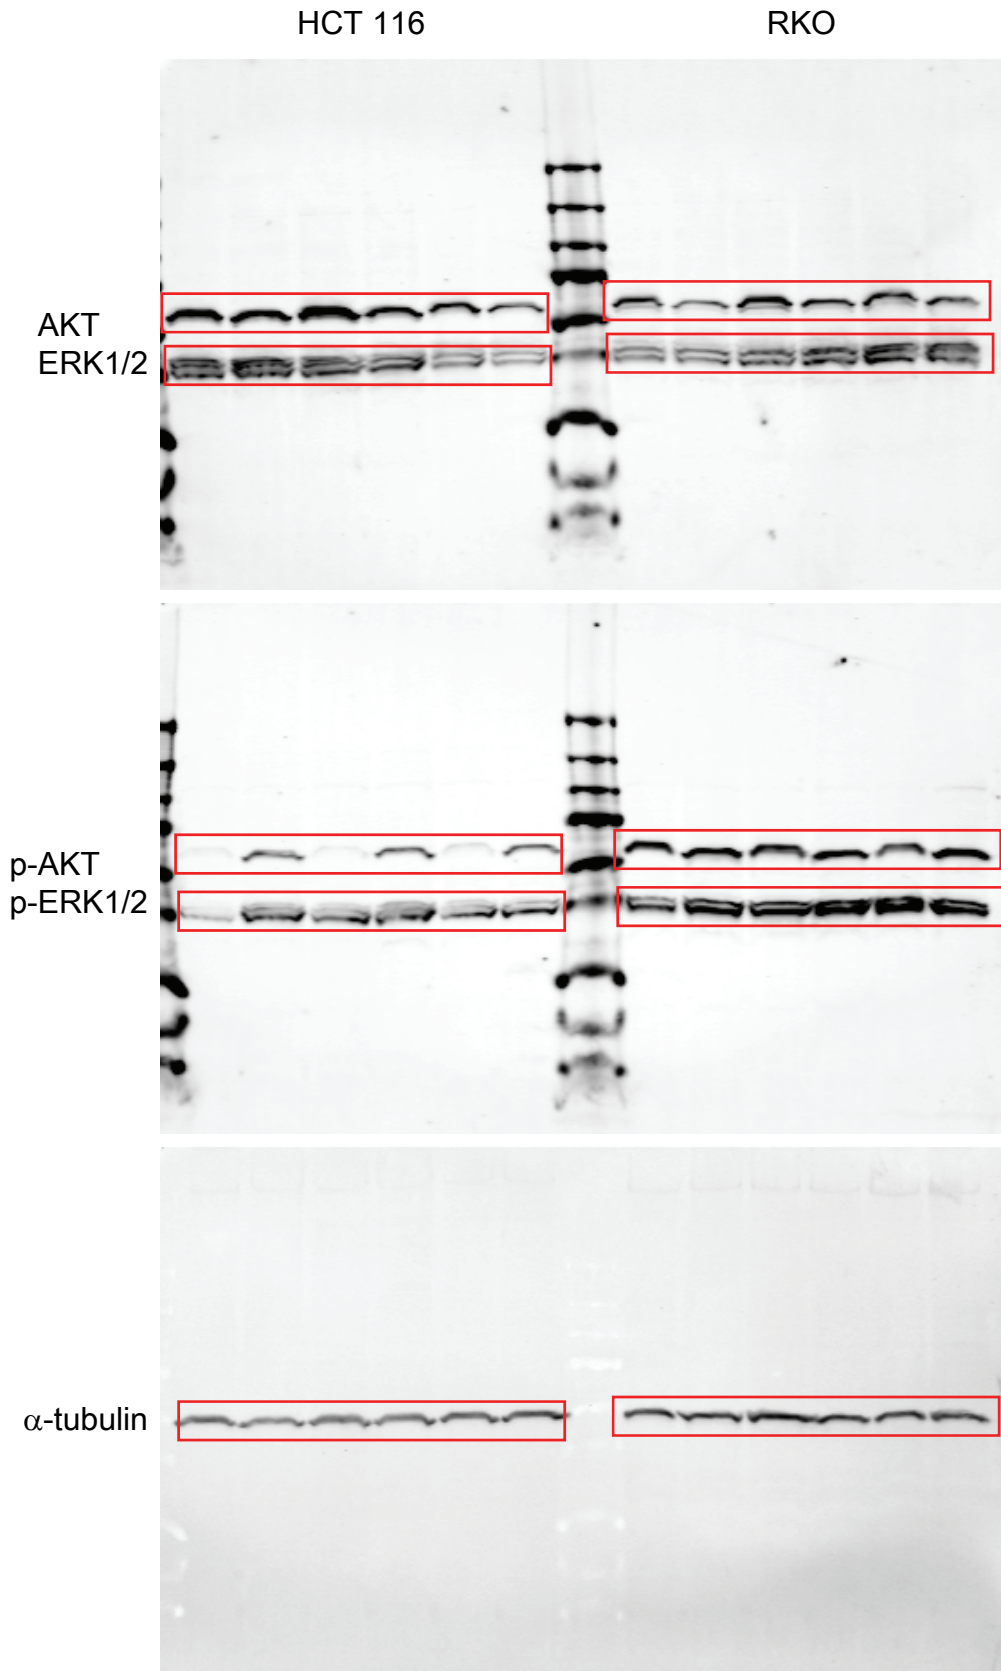

**Supplementary Figure S13.** Uncropped images of Western blotting of Supplementary Fig. S2b

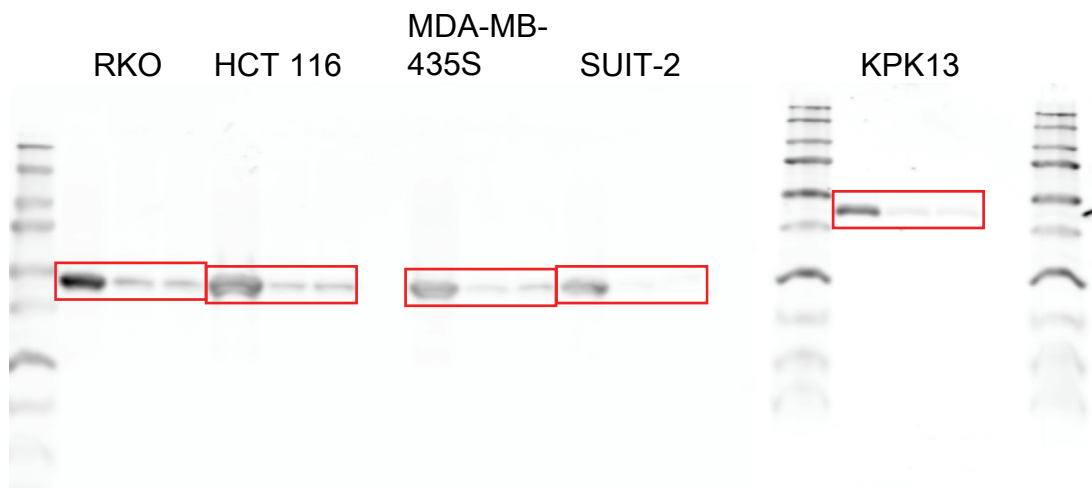

GSK-3 $\beta$

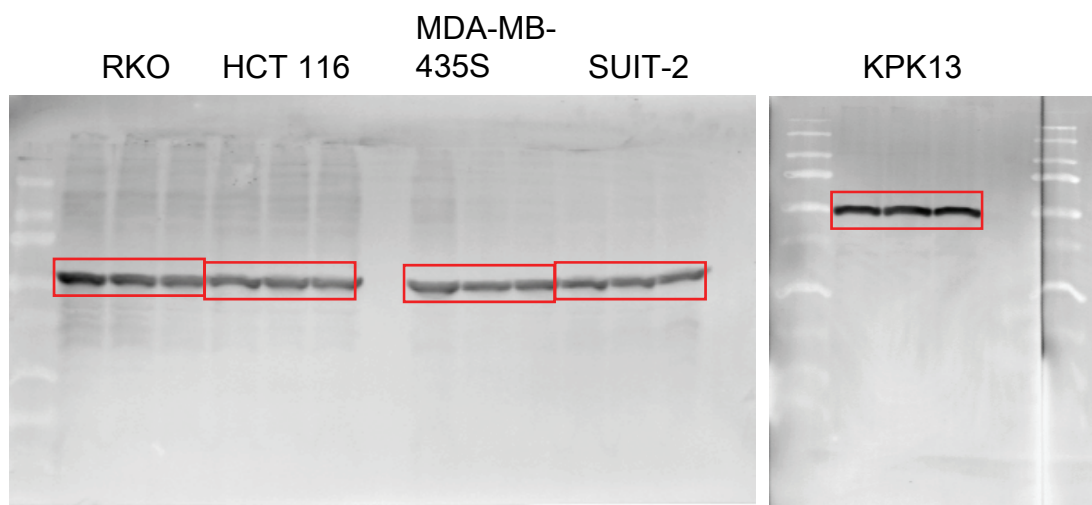

$\alpha$ -tubulin

**Supplementary Figure S14.** Uncropped images of Western blotting of Supplementary Fig. S6a

| Antibody name                  | Supplier                  | Catalog number | Experiment | Dilution |
|--------------------------------|---------------------------|----------------|------------|----------|
| anti-AKT1                      | Cell Signaling Technology | #9272          | WB         | 1:1000   |
| anti-pAKT1                     | Cell Signaling Technology | #4060          | WB         | 1:1000   |
| anti-ERK1/2                    | Cell Signaling Technology | #9102          | WB         | 1:1000   |
| anti-pERK1/2                   | Cell Signaling Technology | #3510          | WB         | 1:1000   |
| anti-pSTAT3                    | Cell Signaling Technology | #9131          | WB         | 1:1000   |
| anti-caspase3                  | Cell Signaling Technology | #9662          | WB         | 1:1000   |
| anti-caspase9                  | Cell Signaling Technology | #9502          | WB         | 1:1000   |
| anti-PARP                      | Cell Signaling Technology | #9532          | WB         | 1:1000   |
| anti- $\alpha$ -tubulin        | Sigma                     | A2066          | WB         | 1:1000   |
| anti-p53                       | Santa Cruz                | sc-6243        | WB         | 1:100    |
| anti- $\beta$ -catenin         | BD                        | 610153         | WB         | 1:1500   |
| anti-mouse IgG, IRDye 800CW    | LI-COR Biosciences        | 926-32210      | WB         | 1:5000   |
| anti-rabbit IgG, IRDye 680RD   | LI-COR Biosciences        | 926-68071      | WB         | 1:5000   |
| anti- $\alpha$ -tubulin        | Sigma                     | A2066          | IC         | 1:100    |
| anti- $\gamma$ -tubulin        | Sigma                     | T6557          | IC         | 1:500    |
| anti-GSK3 $\beta$              | Cell Signaling Technology | #12456         | IC         | 1:200    |
| anti-pGSK3 $\beta$             | Cell Signaling Technology | #5558          | IC         | 1:400    |
| anti-mouse IgG, AlexaFluor 488 | Life Technologies         | A-11029        | IC         | 1:400    |
| anti-rabbit IgG, DyLight 649   | Rockland Immunochemicals  | 610-143-121    | IC         | 1:100    |

**Supplementary TableS1.** List of antibodies used.

WB; western blot, IC; immunocytofluorescent staining.
